# Supplementary material
Source: PubMed Central journal article supplement (PMC3910797)
Supplement: AAC.01228-13_zac001142486so1.pdf [file AAC.01228-13_zac001142486so1.pdf]

Supplemental Table 1 Polymorphisms outside QRDR of *gyrA* and *gyrB* in the 138 fluoroquinolone-resistant *M. tuberculosis* isolates<sup>a</sup>

| Locus                              | Sequence change | Amino acid change | No. of isolates |
|------------------------------------|-----------------|-------------------|-----------------|
| <b>Outside QRDR of <i>gyrA</i></b> |                 |                   |                 |
| <i>gyrA197</i>                     | CTG→CTA         | Leu→Leu           | 10              |
| <i>gyrA226</i>                     | CCG→CGG         | Pro→Arg           | 2               |
| <i>gyrA231</i>                     | GCC→TCC         | Ala→Ser           | 1               |
| <i>gyrA236</i>                     | GGA→CGA         | Gly→Arg           | 1               |
| <i>gyrA238</i>                     | CAG→CGG         | Gln→Arg           | 1               |
| <i>gyrA247</i>                     | GGC→AGC         | Gly→Ser           | 1               |
| <i>gyrA272</i>                     | ACC→ACT         | Thr→Thr           | 1               |
| <i>gyrA277</i>                     | CAG→CAC         | Gln→His           | 1               |
| <i>gyrA288</i>                     | GCC→GAC         | Ala→Asp           | 1               |
| <i>gyrA340</i>                     | AGC→AGA         | Ser→Arg           | 4               |
| <i>gyrA341</i>                     | TTT→CTT         | Phe→Leu           | 8               |
| <i>gyrA341</i>                     | TTT→TTG         | Phe→Leu           | 10              |
| <i>gyrA343</i>                     | GCC→GCT         | Ala→Ala           | 10              |
| <i>gyrA344</i>                     | AAC→ACC         | Asn→Thr           | 1               |
| <i>gyrA384</i>                     | GCA→GTA         | Ala→Val           | 1               |
| <i>gyrA485</i>                     | GAA→GAG         | Glu→Glu           | 1               |
| <i>gyrA498</i>                     | ATC→ATT         | Ile→Ile           | 1               |
| <i>gyrA506</i>                     | AGC→GGC         | Ser→Gly           | 1               |
| <i>gyrA549</i>                     | TTG→TTA         | Leu→Leu           | 1               |
| <i>gyrA552</i>                     | GAC→CAC         | Asp→His           | 4               |
| <i>gyrA568</i>                     | CTG→GTG         | Leu→Val           | 1               |
| <i>gyrA581</i>                     | GCC→GCA         | Ala→Ala           | 2               |
| <i>gyrA614</i>                     | ATT→ATC         | Ile→Ile           | 1               |
| <i>gyrA653</i>                     | CTG→CTC         | Leu→Leu           | 1               |
| <i>gyrA686</i>                     | ACC→ATC         | Thr→Ile           | 1               |
| <i>gyrA714</i>                     | CTG→GTG         | Leu→Val           | 1               |
| <i>gyrA730</i>                     | GGC→GTC         | Gly→Val           | 1               |
| <i>gyrA733</i>                     | AAA→CAA         | Lys→Gln           | 1               |
| <i>gyrA758</i>                     | CGG→TGG         | Arg→Trp           | 1               |
| <i>gyrA768</i>                     | GTC→GTA         | Val→Val           | 1               |
| <i>gyrA809</i>                     | GGC→GGT         | Gly→Gly           | 1               |
| <b>Outside QRDR of <i>gyrB</i></b> |                 |                   |                 |
| <i>gyrB55</i>                      | TCT→TCC         | Ser→Ser           | 1               |
| <i>gyrB105</i>                     | AAC→AGC         | Asn→Ser           | 1               |
| <i>gyrB129</i>                     | GCC→GCT         | Ala→Ala           | 1               |
| <i>gyrB221</i>                     | ACC→ACT         | Thr→Thr           | 1               |
| <i>gyrB229</i>                     | GTC→ATC         | Val→Ile           | 1               |
| <i>gyrB309</i>                     | GCG→GTG         | Ala→Val           | 1               |

|                |         |         |   |
|----------------|---------|---------|---|
| <i>gyrB330</i> | ATG→ATC | Met→Ile | 1 |
| <i>gyrB389</i> | ATC→ACC | Ile→Thr | 1 |
| <i>gyrB393</i> | CTG→CCG | Leu→Pro | 1 |
| <i>gyrB423</i> | GTG→GCG | Val→Ala | 1 |
| <i>gyrB411</i> | AAG→AAA | Lys→Lys | 2 |
| <i>gyrB533</i> | CAC→CGC | His→Arg | 1 |
| <i>gyrB549</i> | GGC→AGC | Gly→Ser | 1 |
| <i>gyrB551</i> | GGG→AGG | Gly→Arg | 1 |
| <i>gyrB579</i> | ATT→CTT | Ile→Leu | 1 |
| <i>gyrB628</i> | GGT→GGC | Gly→Gly | 1 |
| <i>gyrB631</i> | GAG→GGG | Glu→Gly | 1 |
| <i>gyrB642</i> | AAG→GAG | Lys→Glu | 1 |
| <i>gyrB656</i> | GAC→TAC | Asp→Tyr | 1 |
| <i>gyrB662</i> | GAG→GAA | Glu→Glu | 1 |
| <i>gyrB664</i> | ACC→ACG | Thr→Thr | 1 |

<sup>a</sup>QRDR, quinolone resistance-determining region.
